# Supplementary material for: Cobalt nanoparticles encapsulated in a nitrogen and oxygen dual-doped carbon matrix as high-performance microwave absorbers
Source: Royal Society of Chemistry journal article supplement (doi:10.1039/c9qi00535h), 2019-01-01
Supplement: c9qi00535h1.pdf [file c9qi00535h1.pdf]

## Supporting Information

### **Cobalt Nanoparticles Encapsulated in Nitrogen and Oxygen Dual-Doped Carbon Matrix as High-Performance Microwave Absorbers**

*Sifan Zeng<sup>1,2,§</sup>, Mengyu Wang<sup>3,§</sup>, Wanlin Feng<sup>1</sup>, Lini Zhu<sup>1</sup>, Zhen Teng<sup>1</sup>, Haibin Zhang<sup>1,\*</sup>, Shuming Peng<sup>1,2,\*</sup>*

<sup>1</sup> Innovation Research Team for Advanced Ceramics, Institute of Nuclear Physics and Chemistry, China Academy of Engineering Physics, Mianyang, Sichuan 621900, China.

<sup>2</sup> Department of Engineering and Applied Physics, University of Science and Technology of China, Hefei, Anhui 230026, China

<sup>3</sup> Department of Precision Machinery and Precision Instrumentation, University of Science and Technology of China, Hefei, Anhui 230026, China

§ These authors contributed equally to this work.

\* Author to whom correspondence should be addressed, E-mail: hbzhang@caep.cn, pengshuming@caep.cn.

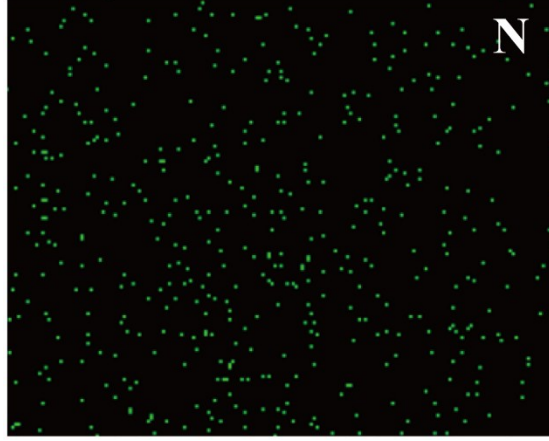

**Figure S1.** The EDS spectroscopy mapping image of N elemental distribution of S900.

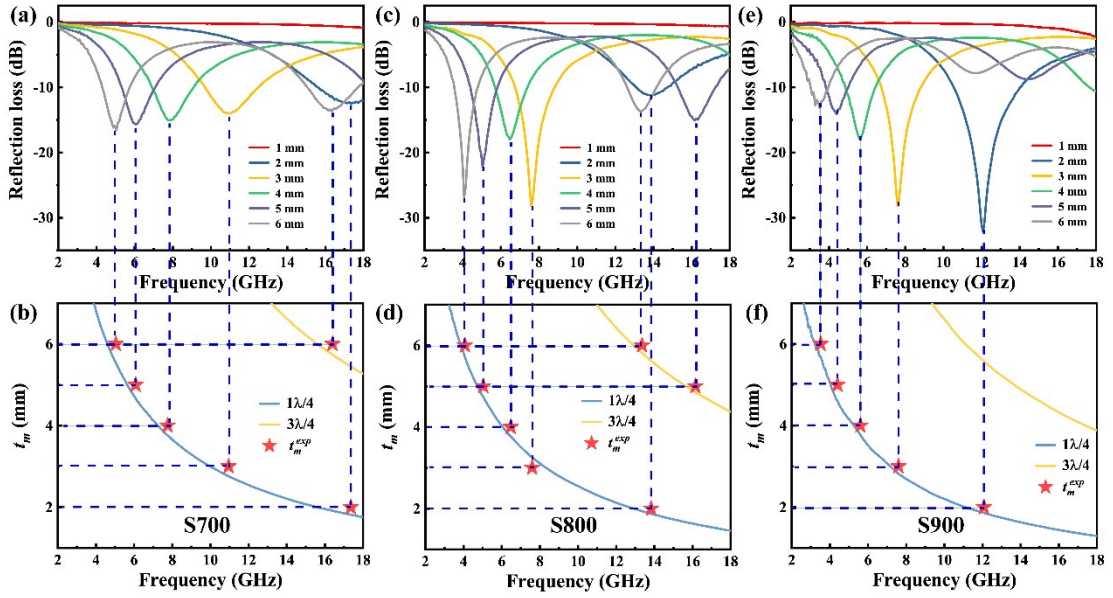

**Figure S2.** (a, c, and e) RL curves versus frequency of different absorber layer thickness, and (b, d, and f) dependence of matching thickness ( $t_m$ ) on matching frequency ( $f_m$ ) at the wavelength of  $1\lambda/4$  and  $3\lambda/4$  of S700, S800, and S900/paraffin mixtures, respectively.

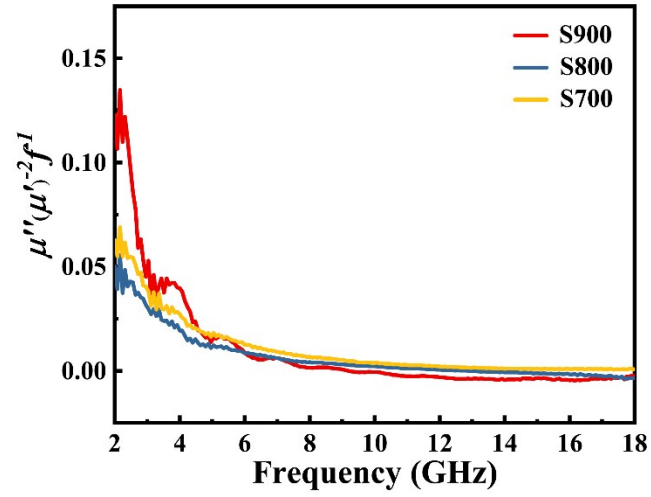

**Figure S3.** The eddy current loss of S700, S800, and S900/paraffin mixtures.

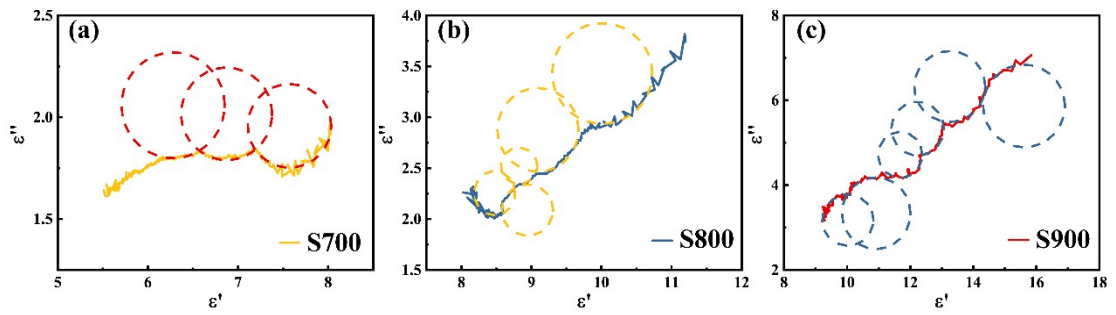

**Figure S4.** The Cole-Cole plots of (a) S700, (b) S800, and (c) S900/paraffin mixtures.
